# Supplementary material for: Genomic Analysis of West Nile Virus Lineage 1 Detected in Mosquitoes during the 2020–2021 Outbreaks in Andalusia, Spain
Source: MDPI journal article supplement (doi:10.3390/v15020266), 2023-01-17
Supplement: s1 [file s1]

## Supplementary Material

**Table S1.** Comparison of the amino acid substitutions between the isolates detected in this work and the strains detected in Spain in previous years and the related Italian sequence JF719067.1 (used as reference) which belong to the WNV lineage 1 cluster 2. The amino acids positions were calculated from the complete sequence AF404757. \* stop codon. ? no sequence available. The unique amino acid from the sequences obtained in this work are in red. The unique amino acids shared between the human sequences and the obtained from mosquitoes in this work are in bold.

| Viral Poliprotein | Amino Acid Position | JF719067 Italy/2009 Gull | FJ766331 GE1b/B Spain/2007 Golden | FJ766332 GE2o/V Spain/2007 Golden | JF707789 HU6365/08 Spain/2008 mosquito | JF719069 H-1b Spain/2010 Horse | MW915462 NG-b Spain/2017 Goshawk | HG994351 isolate 4 Spain/2020 Human | HG994352 isolate 5 Spain/2020 Human | HG994354 isolate 6 Spain/2020 Human | HG994353 isolate 2 Spain/2020 Human | 20c124 Spain/2020 mosquito | 21c560 Spain/2020 mosquito |
|-------------------|---------------------|--------------------------|-----------------------------------|-----------------------------------|----------------------------------------|--------------------------------|----------------------------------|-------------------------------------|-------------------------------------|-------------------------------------|-------------------------------------|----------------------------|----------------------------|
| <b>C</b>          | 34                  | M                        | V                                 | V                                 | V                                      | -                              | -                                | -                                   | -                                   | -                                   | -                                   | -                          | -                          |
|                   | <b>52</b>           | A                        | -                                 | -                                 | -                                      | -                              | -                                | <b>T</b>                            | <b>T</b>                            | <b>T</b>                            | <b>T</b>                            | <b>T</b>                   | <b>T</b>                   |
|                   | 109                 | T                        | -                                 | -                                 | -                                      | A                              | -                                | ?                                   | ?                                   | ?                                   | ?                                   | -                          | -                          |
|                   | 110                 | G                        | -                                 | -                                 | R                                      | -                              | -                                | ?                                   | ?                                   | ?                                   | ?                                   | -                          | -                          |
| <b>M</b>          | 2                   | L                        | -                                 | -                                 | V                                      | -                              | -                                | -                                   | -                                   | -                                   | -                                   | -                          | -                          |
|                   | 64                  | V                        | -                                 | -                                 | -                                      | -                              | A                                | -                                   | -                                   | -                                   | -                                   | -                          | -                          |
| <b>E</b>          | 24                  | V                        | -                                 | -                                 | -                                      | I                              | -                                | -                                   | -                                   | -                                   | -                                   | -                          | -                          |
|                   | 50                  | A                        | -                                 | -                                 | -                                      | -                              | -                                | ?                                   | -                                   | ?                                   | -                                   | <b>V</b>                   | -                          |
|                   | 51                  | A                        | T                                 | T                                 | T                                      | -                              | -                                | -                                   | -                                   | -                                   | -                                   | -                          | -                          |
|                   | 88                  | P                        | S                                 | S                                 | S                                      | -                              | -                                | -                                   | -                                   | -                                   | -                                   | -                          | -                          |
|                   | 352                 | V                        | -                                 | -                                 | -                                      | -                              | -                                | M                                   | -                                   | -                                   | -                                   | -                          | -                          |

|      |     |   |   |   |   |   |   |   |   |   |   |   |   |
|------|-----|---|---|---|---|---|---|---|---|---|---|---|---|
|      | 479 | R | - | - | - | - | - | - | - | - | K | - | - |
|      | 481 | I | - | - | V | - | - | - | - | - | - | - | - |
| NS1  | 35  | Y | H | H | H | - | - | - | - | - | - | - | - |
|      | 70  | S | - | - | - | - | A | - | - | - | - | - | - |
|      | 170 | K | - | - | - | - | - | R | R | R | R | R | R |
|      | 208 | D | H | H | H | - | - | - | - | - | - | - | - |
|      | 284 | M | T | T | T | T | T | T | T | T | T | T | T |
|      | 289 | E | G | G | G | - | - | - | - | - | - | - | - |
|      | 338 | Q | - | - | - | R | - | - | - | - | - | - | - |
| NS2A | 119 | H | - | - | - | - | Y | - | - | - | - | - | - |
|      | 142 | I | - | - | V | - | - | - | - | - | - | - | - |
|      | 158 | L | - | - | - | V | - | - | - | - | - | - | - |
|      | 187 | I | - | - | - | - | V | - | - | - | - | - | - |
|      | 211 | G | - | - | - | - | - | R | R | R | R | R | R |
| NS2B | 97  | I | - | - | - | - | L | - | - | - | - | - | - |
|      | 107 | I | - | - | - | - | V | - | - | - | - | - | - |
| NS3  | 143 | N | - | - | - | - | S | - | - | - | - | - | - |
|      | 177 | A | - | - | - | - | - | - | - | - | - | - | V |
|      | 249 | T | P | P | - | - | - | - | - | - | - | - | - |
|      | 253 | N | - | - | - | - | S | - | - | - | - | - | - |
|      | 338 | T | - | - | S | - | - | - | - | - | - | - | - |
|      | 436 | T | - | - | - | - | A | A | A | A | A | A | A |
|      | 453 | A | - | - | I | - | - | - | - | - | - | - | - |
|      | 465 | N | - | - | - | S | - | - | - | - | - | - | - |
| NS4A | 6   | I | - | - | - | - | V | - | - | - | - | - | - |
|      | 85  | I | V | V | V | V | V | V | V | V | V | V | V |
|      | 100 | S | P | P | P | P | P | P | P | P | P | P | P |
| NS4B | 17  | F | - | - | - | - | - | L | - | - | - | - | - |
|      | 23  | V | - | - | - | A | - | - | - | - | - | - | - |
|      | 115 | A | T | T | T | - | - | - | - | - | - | - | - |

|     |     |   |   |   |   |   |   |          |          |          |          |          |          |
|-----|-----|---|---|---|---|---|---|----------|----------|----------|----------|----------|----------|
| NS5 | 241 | T | - | - | - | - | I | -        | -        | -        | -        | -        | -        |
|     | 249 | D | - | - | - | - | E | -        | -        | -        | -        | -        | -        |
|     | 41  | K | - | - | - | - | - | <b>R</b> | <b>R</b> | <b>R</b> | <b>R</b> | <b>R</b> | <b>R</b> |
|     | 88  | C | - | - | - | S | - | -        | -        | -        | -        | -        | -        |
|     | 194 | K | - | - | R | - | - | -        | -        | -        | -        | -        | -        |
|     | 258 | A | V | V | V | V | V | V        | V        | V        | V        | V        | V        |
|     | 422 | K | R | R | R | R | R | -        | -        | -        | -        | -        | -        |
|     | 426 | E | A | A | - | - | - | -        | -        | -        | -        | -        | -        |
|     | 436 | M | I | I | I | - | - | -        | -        | -        | -        | -        | -        |
|     | 450 | H | - | - | - | - | Y | -        | -        | -        | -        | -        | -        |
|     | 503 | K | - | - | - | - | Q | -        | -        | -        | -        | -        | -        |
